# Supplementary material
Source: ML conference proceedings conference paper supplement (https://proceedings.mlr.press/v108/zimmer20a.html)
Supplement: Supplementary file 1 [file zimmer20a-supp.zip]

Archive with 3 entries (3 files):
- Adapt-Cost-Eval-in-action.avi
- Adapt-Discretization_Appendix.pdf
- robotExploration.mov
